# Supplementary material for: Good News about Bad News: Gamified Inoculation Boosts Confidence and Cognitive Immunity Against Fake News
Source: PubMed Central journal article supplement (PMC6952868; doi:10.5334/joc.91), 2020-01-10
Supplement: joc-3-1-91-s1.pdf [file joc-3-1-91-s1.pdf]

## Supplementary Information

### Experimental condition

|                        | Inoculation (n = 96) |            |            |                 | Control (n = 102) |            |            |                 | Cohen's <i>d</i> |
|------------------------|----------------------|------------|------------|-----------------|-------------------|------------|------------|-----------------|------------------|
|                        | $M_{pre}$            | $M_{post}$ | $M_{diff}$ | 95% $CI_{diff}$ | $M_{pre}$         | $M_{post}$ | $M_{diff}$ | 95% $CI_{diff}$ |                  |
| <b>Fake news scale</b> | 3.14                 | 2.69       | -0.45      | [-0.29, -0.61]  | 3.32              | 3.23       | -0.09      | [-0.03, -0.15]  | 0.60             |
| <b>Impersonation</b>   | 3.22                 | 2.76       | -0.46      | [-0.21, -0.70]  | 3.49              | 3.48       | -0.01      | [-0.16, 0.14]   | 0.45             |
| <b>Polarisation</b>    | 2.85                 | 2.59       | -0.26      | [-0.03, -0.48]  | 3.07              | 2.95       | -0.12      | [-0.27, 0.02]   | 0.14             |
| <b>Conspiracy</b>      | 3.13                 | 2.58       | -0.55      | [-0.33, -0.77]  | 3.47              | 3.27       | -0.20      | [-0.04, -0.36]  | 0.36             |
| <b>Emotion</b>         | 3.39                 | 2.87       | -0.52      | [-0.29, -0.74]  | 3.53              | 3.44       | -0.09      | [-0.23, 0.05]   | 0.45             |
| <b>Discrediting</b>    | 3.36                 | 2.80       | -0.56      | [-0.33, -0.79]  | 3.39              | 3.41       | 0.02       | [-0.19, 0.14]   | 0.58             |
| <b>Trolling</b>        | 2.83                 | 2.52       | -0.31      | [-0.12, -0.49]  | 2.96              | 2.83       | -0.13      | [-0.02, 0.28]   | 0.22             |

*Supplementary Table 1.* Average reliability (pre-post) judgments overall and for each fake news badge by experimental condition.
