# Supplementary material for: Good News about Bad News: Gamified Inoculation Boosts Confidence and Cognitive Immunity Against Fake News
Source: PubMed Central journal article supplement (PMC6952868; doi:10.5334/joc.91), 2020-01-10
Supplement: joc-3-1-91-s2.pdf [file joc-3-1-91-s2.pdf]

**Experimental condition**

|                        | <b>Inoculation (n = 96)</b> |                          |                          |                        | <b>Control (n= 102)</b> |                          |                          |                        | <b>Cohen's <i>d</i></b> |
|------------------------|-----------------------------|--------------------------|--------------------------|------------------------|-------------------------|--------------------------|--------------------------|------------------------|-------------------------|
|                        | <i>M</i> <sub>pre</sub>     | <i>M</i> <sub>post</sub> | <i>M</i> <sub>diff</sub> | 95% CI <sub>diff</sub> | <i>M</i> <sub>pre</sub> | <i>M</i> <sub>post</sub> | <i>M</i> <sub>diff</sub> | 95% CI <sub>diff</sub> |                         |
| <b>Fake news scale</b> | 5.25                        | 5.47                     | 0.22                     | [0.10, 0.34]           | 5.27                    | 5.21                     | -0.06                    | [-0.03, 0.14]          | 0.52                    |
| <b>Impersonation</b>   | 5.56                        | 5.71                     | 0.15                     | [-0.05, 0.35]          | 5.68                    | 5.51                     | -0.17                    | [-0.00, 0.34]          | 0.34                    |
| <b>Polarisation</b>    | 5.13                        | 5.34                     | 0.21                     | [0.01, 0.41]           | 5.11                    | 5.10                     | -0.01                    | [-0.14, 0.16]          | 0.25                    |
| <b>Conspiracy</b>      | 5.14                        | 5.40                     | 0.26                     | [0.08, 0.44]           | 5.10                    | 5.12                     | 0.02                     | [-0.20, 0.15]          | 0.27                    |
| <b>Emotion</b>         | 5.15                        | 5.41                     | 0.26                     | [0.10, 0.42]           | 5.25                    | 5.12                     | -0.13                    | [-0.03, 0.29]          | 0.49                    |
| <b>Discrediting</b>    | 5.28                        | 5.46                     | 0.18                     | [0.01, 0.35]           | 5.19                    | 5.17                     | -0.02                    | [-0.15, 0.20]          | 0.23                    |
| <b>Trolling</b>        | 5.24                        | 5.48                     | 0.24                     | [0.05, 0.42]           | 5.26                    | 5.24                     | -0.02                    | [-0.13, 0.17]          | 0.31                    |

*Supplementary Table 2.* Average confidence (pre-post) judgments overall and for each fake news badge by experimental condition.
