# Supplementary material for: Good News about Bad News: Gamified Inoculation Boosts Confidence and Cognitive Immunity Against Fake News
Source: PubMed Central journal article supplement (PMC6952868; doi:10.5334/joc.91), 2020-01-10
Supplement: joc-3-1-91-s7.pdf [file joc-3-1-91-s7.pdf]

Supplementary Figure 5. All 18 fake news items participants viewed pre-post by badge

## Impersonation

 HBO  
@HBO | Official Twitter account of HBO.

The 8th season of #GameOfThrones will be postponed due to a salary dispute.

 Dr. Tom Lee  
@ProfTomLee | Professor of Modern Art

As a Scientist, I do not believe there is enough evidence to suggest humans can influence the climate.

 Warren Buffett  
@WarrenBuffet | Billionaire, investor, friend

Investment advice: buy only stocks that make you happy.

## Emotional Content

 Parents Weekly  
@ParentsWeekly

NEWS ALERT: Baby formula caused HORRIFIC outbreak of new, terrifying disease among helpless infants. Parents despair.

 Daily Web News  
@DailyWebNews | Daily updates on politics and more

Brutally beaten senior desperately begs for help at hospital, is given TERRIBLE medical care only after ENORMOUS wait.

 Animals News  
@AnimalsNews

HEARTBREAKING story: baby elephant gets horribly hurt after falling off a ledge, mother elephant cries for HOURS!

## Conspiracy Theories

 Daily Web News  
@DailyWebNews | Daily updates on politics and more

The Bitcoin exchange rate is being manipulated by a small group of rich bankers. #InvestigateNow

 Live News Now  
@LiveNewsNow | News and opinion.

BREAKING: Insurance companies are using your phone to track your fast food consumption.

 Raw News at 1  
@RawNewsAt1 | Live action news on your screen

Scientists discovered solution to greenhouse effect years ago but aren't allowed to publish it, report claims.

## Discrediting Opponents

 The International Post Online  
@internationalpostonline | Online channel for news updates

The mainstream media has been caught in so many lies that it can't be trusted as a reliable news source. #FakeNews

 ENG News  
@ENGNews | News and opinion.

Report reveals scientists' underlying agendas and preferences, casting doubt on their findings. #QuestionScience

 Susan P  
@SusanP | Retweet doesn't imply endorsement.

Medical students only receive a total of 5 hours of tutoring in nutrition. Don't trust doctors' dietary advice.

## Polarisation

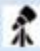

The Daily Chronicle  
@DailyChron

New study shows right-wing people lie much more than left-wing people.

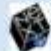

Next Global  
@NextGlobal

Worldwide rise of left-wing extremist groups damaging world economy: UN report.

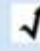

Rapid Updates  
@RapidUpdates

The myth of "equal IQ" between left-wing and right-wing people exposed. #TruthMatters

## Trolling

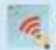

Quad Media  
@QuadMedia

Another shark loan for developing countries @WorldBank? #WorldOfExtortion #HumanBanking

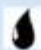

Johnson Crude Oil  
@JohnsonCrudeOil

Hey @LeoDiCaprio, it's snowing and freezing in New York. Could use some of that global warming you're always going on about!

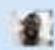

Joe Stephenson  
@NoScheeseJoe

A sandwich maker at Subway just took a bite out of my sub! Are you starving your employees @Subway?
