# Supplementary material for: Good News about Bad News: Gamified Inoculation Boosts Confidence and Cognitive Immunity Against Fake News
Source: PubMed Central journal article supplement (PMC6952868; doi:10.5334/joc.91), 2020-01-10

Supplementary Figure 6. Scree plot for reliability judgments following PCA.

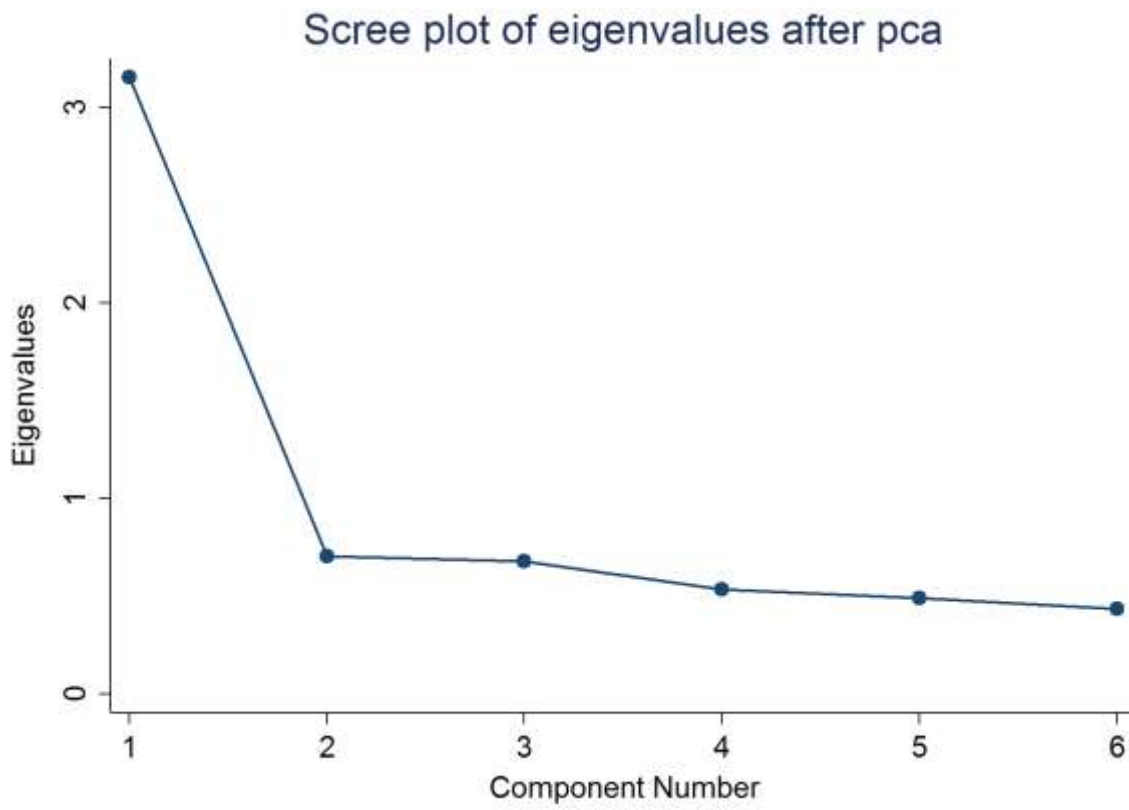

Supplement: joc-3-1-91-s8.pdf [file joc-3-1-91-s8.pdf]
