# Supplementary material for: Good News about Bad News: Gamified Inoculation Boosts Confidence and Cognitive Immunity Against Fake News
Source: PubMed Central journal article supplement (PMC6952868; doi:10.5334/joc.91), 2020-01-10

Supplementary Figure 7. Scree plot for confidence judgments following PCA.

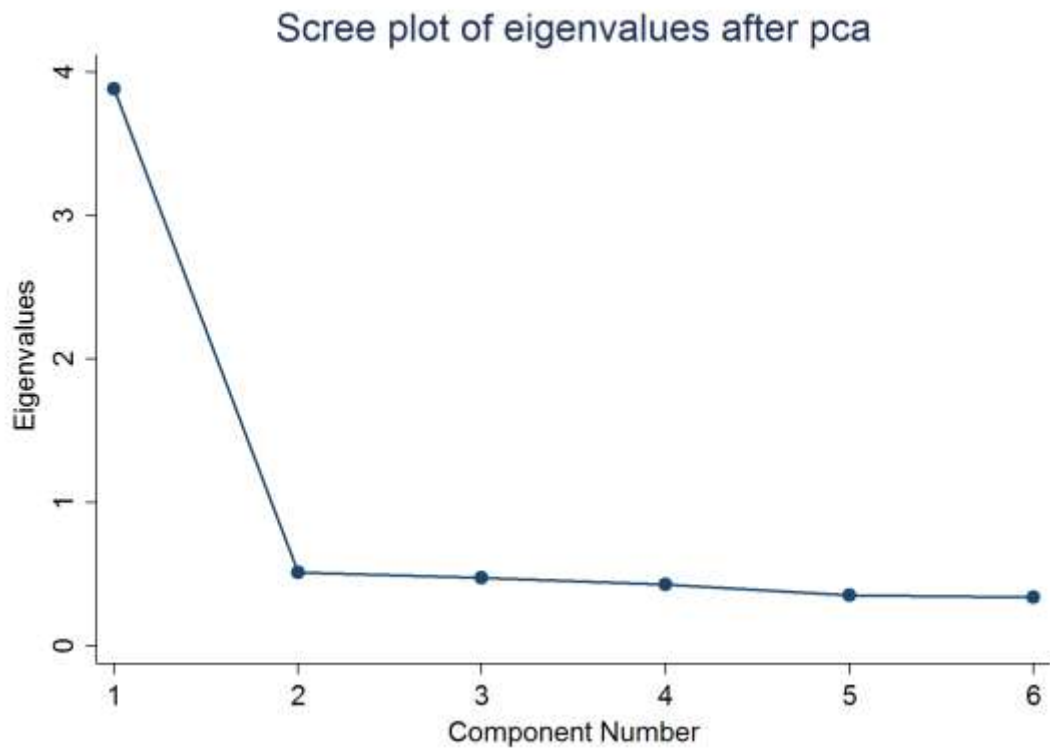

Supplement: joc-3-1-91-s9.pdf [file joc-3-1-91-s9.pdf]
